# Supplementary material for: Characterization of Seed Oil from Six In Situ Collected Wild Amaranthus Species
Source: MDPI journal article supplement (doi:10.3390/d15020237), 2023-02-08
Supplement: s1 [file s1]

**Table S2:** Tocopherol (a-tocopherol, beta-tocopherol, delta tocopherol) composition of Amaranth seed oil collected from Italian wild habitats. AVG: Average value, SD: Standard deviation.

|                                               |        | a-tocopherol<br>ppm |       | beta-tocopherol<br>ppm |        | delta-tocopherol<br>ppm |        |
|-----------------------------------------------|--------|---------------------|-------|------------------------|--------|-------------------------|--------|
| Species                                       | Region | AVG                 | SD    | AVG                    | SD     | AVG                     | SD     |
| <i>A. cruentus</i> L.                         | VEN    | 14                  | 12.76 | 21                     | 11.94  | 117                     | 69.67  |
| <i>A. hybridus</i> L.                         | FVG    | 12                  | 21.64 | 26                     | 10.17  | 289                     | 233.58 |
| <i>A. hybridus</i> L.                         | PIE    | 0                   | 0.00  | 31                     | 4.05   | 39                      | 23.51  |
| <i>A. hybridus</i> L.                         | VEN    | 0                   | 0.00  | 21                     | 10.25  | 194                     | 144.05 |
| <i>A. hypochondriacus</i> L.                  | VEN    | 12                  | 20.18 | 29                     | 4.95   | 99                      | 45.83  |
| <i>A. hypochondriacus</i> L.                  | LAZ    | 0                   | 0.00  | 26                     | 11.68  | 123                     | 5.31   |
| <i>A. muricatus</i> (Gillies ex Moq.) Hieron. | MOL    | 0                   | 0.00  | 158                    | 234.34 | 200                     | 177.72 |
| <i>A. tuberculatus</i> (Moq.) J.D. Sauer.     | MAR    | 0                   | 0.00  | 11                     | 6.53   | 212                     | 156.74 |
| <i>A. viridis</i> L.                          | CAM    | 6                   | 10.91 | 13                     | 21.84  | 197                     | 224.29 |
