# Supplementary material for: Characterization of Seed Oil from Six In Situ Collected Wild Amaranthus Species
Source: MDPI journal article supplement (doi:10.3390/d15020237), 2023-02-08
Supplement: s1 [file s1]

**Table S1:** Sterol (Beta-sitosterol, Brassicasterol, Campesterol, Stigmasterol) composition of Amaranth seed oil collected from Italian wild habitats. AVG: Average value, SD: Standard deviation.

|                                               |        | B-sitosterol<br>ppm |        | Brassica<br>sterol ppm |       | Campesterol<br>ppm |      | Stigmasterol<br>ppm |       |
|-----------------------------------------------|--------|---------------------|--------|------------------------|-------|--------------------|------|---------------------|-------|
| Species                                       | Region | AVG                 | SD     | AVG                    | SD    | AVG                | SD   | AVG                 | SD    |
| <i>A. cruentus</i> L.                         | VEN    | 145                 | 125.84 | 12                     | 9.84  | 6                  | 5.04 | 45                  | 8.67  |
| <i>A. hybridus</i> L.                         | FVG    | 351                 | 272.93 | 19                     | 11.36 | 6                  | 5.37 | 74                  | 20.21 |
| <i>A. hybridus</i> L.                         | PIE    | 0                   | 0.00   | 13                     | 1.12  | 4                  | 3.17 | 130                 | 10.18 |
| <i>A. hybridus</i> L.                         | VEN    | 280                 | 266.10 | 26                     | 15.37 | 9                  | 7.94 | 46                  | 11.93 |
| <i>A. hypochondriacus</i> L.                  | VEN    | 135                 | 73.67  | 20                     | 15.94 | 9                  | 7.63 | 55                  | 5.22  |
| <i>A. hypochondriacus</i> L.                  | LAZ    | 738                 | 474.93 | 43                     | 30.06 | 2                  | 2.10 | 73                  | 20.75 |
| <i>A. muricatus</i> (Gillies ex Moq.) Hieron. | MOL    | 144                 | 126.38 | 9                      | 7.82  | 6                  | 5.78 | 20                  | 18.27 |
| <i>A. tuberculatus</i> (Moq.) J.D. Sauer.     | MAR    | 47                  | 81.89  | 23                     | 12.62 | 5                  | 2.18 | 8                   | 2.59  |
| <i>A. viridis</i> L.                          | CAM    | 66                  | 113.70 | 10                     | 11.78 | 4                  | 6.53 | 11                  | 15.53 |
