# Supplementary material for: Characterization of Seed Oil from Six In Situ Collected Wild Amaranthus Species
Source: MDPI journal article supplement (doi:10.3390/d15020237), 2023-02-08
Supplement: s1 [file s1]

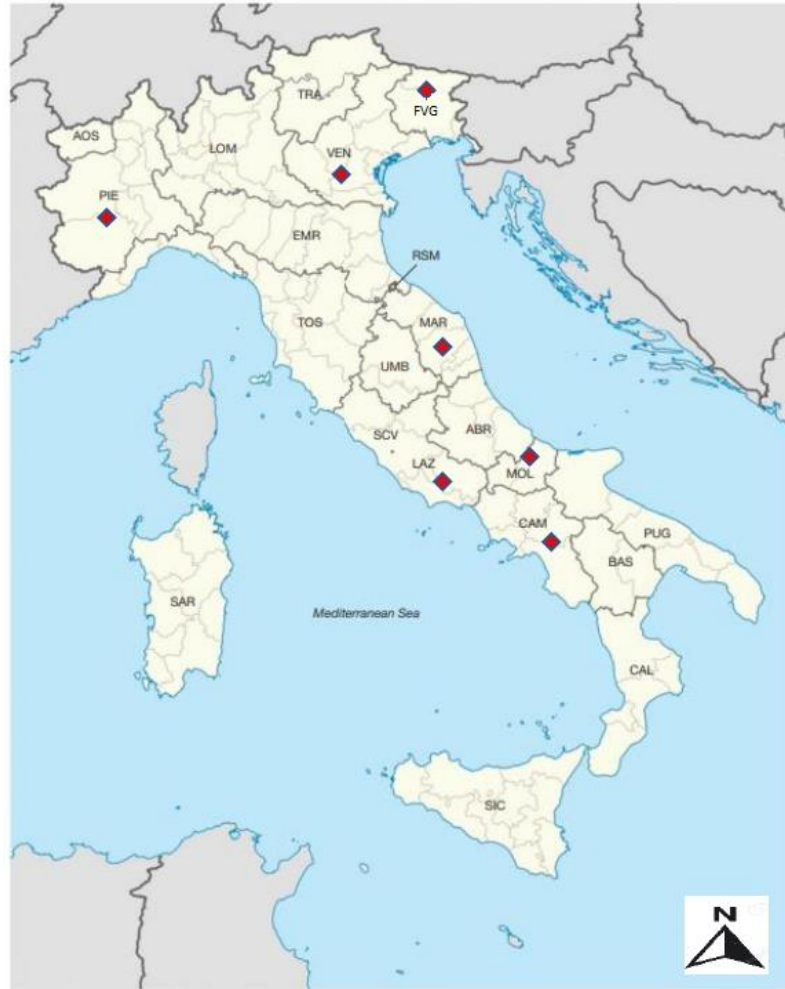

**Figure S1.** The regions where the *Amaranthus* species were collected in Italy. CAM Campania; FVG Friuli-Venezia Giulia; LAZ Lazio; MAR Marche; MOL Molise; PIE Piedmont; VEN Veneto. Other regions: AOS Val d'Aosta; LOM Lombardia; TRA Trentino-Alto Adige; LIG Liguria; EMR Emilia-Romagna; SMR Republic of San Marino; TOS Toscana; UMB Umbria; SCV Vatican City; State ABR Abruzzo; PUG Puglia; BAS Basilicata; CAL Calabria; SAR Sardegna; SIC Sicilia.
